# Supplementary material
Source: publisher figshare collection journal article supplement (https://wellcome.figshare.com/ndownloader/files/20162327)
Supplement: Supplementary file 1 [file 20162327]

## Sheet: Publisher volume summary
Publisher								Publisher
Elsevier BV								Springer Science and Business Media LLC	1591			154 Publishers
Springer Science and Business Media LLC								Elsevier BV	1343
Springer Science and Business Media LLC								Wiley	614				Proportion published
Springer Science and Business Media LLC								Oxford University Press (OUP)	434			Top 10 publisher	0.715377
Springer Science and Business Media LLC								Public Library of Science (PLoS)	394			Top 25 publishers	0.87297
Elsevier BV								BMJ	242			Top 30 publishers	0.898076
Elsevier BV								Frontiers Media SA	219			Top 35 publishers	0.916769
American Diabetes Association								Ovid Technologies (Wolters Kluwer Health)	155			Top 48 publishers	0.948697
American Society of Hematology								Proceedings of the National Academy of Sciences	126
Public Library of Science (PLoS)								F1000 Research Ltd	125
Public Library of Science (PLoS)								American Society for Microbiology	120
American Society of Hematology								Informa UK Limited	120
Society for Neuroscience								eLife Sciences Publications, Ltd	117
Elsevier BV								American Chemical Society (ACS)	105
F1000 Research Ltd								SAGE Publications	87
Springer Science and Business Media LLC								Cambridge University Press (CUP)	79
Springer Science and Business Media LLC								The Company of Biologists	73
Springer Science and Business Media LLC								American Association for the Advancement of Science (AAAS)	72
Springer Science and Business Media LLC								Society for Neuroscience	69
Annual Reviews								The Royal Society	65
Wiley								MDPI AG	53
Elsevier BV								American Society for Biochemistry & Molecular Biology (ASBMB)	52
Elsevier BV								Microbiology Society	52
Elsevier BV								Rockefeller University Press	46
Springer Science and Business Media LLC								EMBO	45
Ovid Technologies (Wolters Kluwer Health)								Cold Spring Harbor Laboratory	42
Springer Science and Business Media LLC								Royal Society of Chemistry (RSC)	40
Frontiers Media SA								Portland Press Ltd.	38
Elsevier BV								Genetics Society of America	32
Springer Science and Business Media LLC								The American Association of Immunologists	32
The American Association of Immunologists								The Endocrine Society	30
Frontiers Media SA								American Physiological Society	29
Frontiers Media SA								American Society for Clinical Investigation	27
Wiley								American Association for Cancer Research (AACR)	26
The Company of Biologists								Impact Journals, LLC	25
F1000 Research Ltd								MyJove Corporation	25
Frontiers Media SA								American Thoracic Society	23
Springer Science and Business Media LLC								American Society of Hematology	21
Springer Science and Business Media LLC								Institute of Electrical and Electronics Engineers (IEEE)	19
Springer Science and Business Media LLC								American Diabetes Association	18
Public Library of Science (PLoS)								Centers for Disease Control and Prevention (CDC)	18
Microbiology Society								Dove Medical Press Ltd.	18
Elsevier BV								European Respiratory Society (ERS)	18
Wiley								American Medical Association (AMA)	16
Springer Science and Business Media LLC								Annual Reviews	16
Proceedings of the National Academy of Sciences								American Society for Cell Biology (ASCB)	14
Springer Science and Business Media LLC								Association for Research in Vision and Ophthalmology (ARVO)	14
Public Library of Science (PLoS)								Future Medicine Ltd	14
Wiley								International Union of Crystallography (IUCr)	14
American Chemical Society (ACS)								Mary Ann Liebert Inc	14
Springer Science and Business Media LLC								American Society of Tropical Medicine and Hygiene	12
Elsevier BV								International Union Against Tuberculosis and Lung Disease	12
BMJ								JMIR Publications Inc.	12
Springer Science and Business Media LLC								MIT Press - Journals	11
Wiley								American Psychological Association (APA)	10
Springer Science and Business Media LLC								Bioscientifica	10
Springer Science and Business Media LLC								Hindawi Limited	10
Elsevier BV								IOS Press	10
Springer Science and Business Media LLC								Royal College of Psychiatrists	10
Portland Press Ltd.								Ferrata Storti Foundation (Haematologica)	9
American Chemical Society (ACS)								FASEB	8
Frontiers Media SA								IOP Publishing	8
Springer Nature								Project Muse	8
Springer Science and Business Media LLC								Bio-Protocol, LLC	7
Springer Nature								Unknown	7
Proceedings of the National Academy of Sciences								WHO Press	7
SAGE Publications								AIP Publishing	6
BMJ								AME Publishing Company	6
Wiley								Ethiopian Medical Association	6
Oxford University Press (OUP)								Galenos Yayinevi	6
MyJove Corporation								Massachusetts Medical Society	6
Springer Nature								S. Karger AG	6
Springer Nature								American Society of Nephrology (ASN)	5
Frontiers Media SA								Joule Inc.	5
Elsevier BV								Medknow	5
Elsevier BV								PeerJ	5
Wiley								Shared Science Publishers OG	5
Springer Nature								European Centre for Disease Control and Prevention (ECDC)	4
Microbiology Society								IEEE	4
Springer Science and Business Media LLC								Institute of Mathematical Statistics	4
American Chemical Society (ACS)								Pan African Medical Journal	4
Wiley								The Optical Society	4
Elsevier								UPV/EHU Press	4
BMJ								Acoustical Society of America (ASA)	3
BMJ								American Society for Pharmacology & Experimental Therapeutics (ASPET)	3
MDPI AG								American Society of Microbiology	3
Wiley								American Speech Language Hearing Association	3
Springer Science and Business Media LLC								Emerald	3
Elsevier BV								Future Science Ltd	3
Springer Nature								Georg Thieme Verlag KG	3
Wiley								International Global Health Society	3
Springer Nature								PAGEPress Publications	3
SAGE Publications								Society of Nuclear Medicine	3
Cambridge University Press (CUP)								SPIE-Intl Soc Optical Eng	3
Cambridge University Press (CUP)								Walter de Gruyter GmbH	3
Elsevier BV								World Scientific Pub Co Pte Lt	3
BMJ								African Journals Online (AJOL)	2
The American Association of Immunologists								American Association for Clinical Chemistry (AACC)	2
Elsevier BV								American Psychiatric Association Publishing	2
Proceedings of the National Academy of Sciences								American Society of Clinical Oncology (ASCO)	2
Ferrata Storti Foundation (Haematologica)								AOSIS	2
Springer Science and Business Media LLC								Brill	2
Springer Science and Business Media LLC								Environmental Health Perspectives	2
Elsevier BV								Ivyspring International Publisher	2
Springer Science and Business Media LLC								Korean College of Neuropsychopharmacology	2
Wiley								Korean Society of Exercise Rehabilitation	2
Elsevier BV								OpenEdition	2
Elsevier BV								Radiological Society of North America (RSNA)	2
Wiley								Royal College of Physicians	2
SAGE Publications								The Ohio State University Libraries	2
Portland Press Ltd.								Ubiquity Press, Ltd.	2
AME Publishing Company								Alcohol Research Documentation, Inc.	1
AME Publishing Company								Alphamed Press	1
Elsevier BV								American College of Physicians	1
American Association for the Advancement of Science (AAAS)								Asian Australasian Association of Animal Production Societies	1
The Royal Society								Bentham Science Publishers Ltd.	1
Elsevier BV								Canadian Society of Hospital Pharmacists (CSHP)	1
Frontiers Media SA								Edinburgh University Press	1
Elsevier BV								Equinox Publishing	1
The Royal Society								FapUNIFESP (SciELO)	1
Oxford University Press (OUP)								Fundacao Faculdade de Medicina	1
Elsevier BV								Guilford Publications	1
Elsevier BV								Health Affairs (Project Hope)	1
Oxford University Press (OUP)								Human Kinetics	1
Elsevier BV								Hylonome	1
Springer Science and Business Media LLC								Infectious Disease and Control Branch (IDPCB) - Public Health Agency of Canada	1
BMJ								International Medical Publisher (Fundacion de Neurociencias)	1
BMJ								International Press of Boston	1
Royal Society of Chemistry (RSC)								Japan Atherosclerosis Society	1
Elsevier BV								Japan Epidemiological Association	1
American Medical Association (AMA)								Jordan Publishing	1
Elsevier BV								Korean Society for Laboratory Medicine (KAMJE)	1
Oxford University Press (OUP)								Korean Society for Parasitology	1
Ovid Technologies (Wolters Kluwer Health)								Korean Stroke Society	1
Oxford University Press (OUP)								MalariaWorld	1
Ovid Technologies (Wolters Kluwer Health)								Man in India	1
Wiley								Max Planck Institute for Demographic Research	1
Ovid Technologies (Wolters Kluwer Health)								O.I.E (World Organisation for Animal Health)	1
MIT Press - Journals								Philosophy Documentation Center	1
Proceedings of the National Academy of Sciences								Sciaccess Publishers LLC	1
American Society for Biochemistry & Molecular Biology (ASBMB)								Scitechnol Biosoft Pvt. Ltd.	1
F1000 ( Faculty of 1000 Ltd)								South African MedicalAssociation NPC	1
Elsevier BV								Swansea University	1
Elsevier BV								Taylor & Francis	1
Rockefeller University Press								The Journal of Rheumatology	1
Public Library of Science (PLoS)								The Pennsylvania State University Press	1
Springer Nature								The Sax Institute	1
BMJ								Universitatea de Vest Vasile Goldis din Arad	1
The American Association of Immunologists								University of Chicago Press	1
American Society of Hematology								University of Michigan Library	1
MyJove Corporation								University of Texas Press	1
Wiley								University of Toronto Libraries - UOTL	1
Public Library of Science (PLoS)								VM Media SP. zo.o VM Group SK	1
Springer Science and Business Media LLC								Wildlife Disease Association	1
Elsevier BV
Elsevier BV									7329
Elsevier BV
Springer Science and Business Media LLC
F1000 Research Ltd
Public Library of Science (PLoS)
Springer Science and Business Media LLC
Institute of Mathematical Statistics
Wiley
Springer Nature
Institute of Mathematical Statistics
Elsevier BV
Elsevier BV
Public Library of Science (PLoS)
Springer Science and Business Media LLC
Springer Science and Business Media LLC
American Society for Biochemistry & Molecular Biology (ASBMB)
Shared Science Publishers OG
American Physiological Society
Elsevier BV
Elsevier BV
Springer Science and Business Media LLC
Springer Nature
Springer Science and Business Media LLC
Springer Science and Business Media LLC
Proceedings of the National Academy of Sciences
Springer Nature
Public Library of Science (PLoS)
Elsevier BV
Proceedings of the National Academy of Sciences
Wiley
Springer Science and Business Media LLC
BMJ
Rockefeller University Press
Springer Science and Business Media LLC
Cambridge University Press (CUP)
Ovid Technologies (Wolters Kluwer Health)
Springer Science and Business Media LLC
Wiley
Wiley
Elsevier BV
Elsevier BV
Elsevier BV
BMJ
Public Library of Science (PLoS)
American Psychological Association (APA)
Wiley
Wiley
Elsevier BV
Future Medicine Ltd
Elsevier BV
Springer Nature
Springer Science and Business Media LLC
Informa UK Limited
SAGE Publications
F1000 ( Faculty of 1000 Ltd)
Oxford University Press (OUP)
BMJ
Springer Science and Business Media LLC
Public Library of Science (PLoS)
Elsevier BV
Elsevier BV
Cambridge University Press (CUP)
Frontiers Media SA
Springer Science and Business Media LLC
Springer Science and Business Media LLC
eLife Sciences Publications, Ltd
The Company of Biologists
Elsevier BV
American Physiological Society
Springer Science and Business Media LLC
Wiley
Elsevier BV
Springer Science and Business Media LLC
Elsevier BV
Elsevier BV
Springer Science and Business Media LLC
Springer Science and Business Media LLC
Society for Neuroscience
Wiley
Wiley
Elsevier BV
Ovid Technologies (Wolters Kluwer Health)
Springer Science and Business Media LLC
American Society of Tropical Medicine and Hygiene
Wiley
Springer Science and Business Media LLC
BMJ
S. Karger AG
Frontiers Media SA
Elsevier BV
Springer Nature
Springer Science and Business Media LLC
Public Library of Science (PLoS)
SAGE Publications
Wiley
Oxford University Press (OUP)
Elsevier BV
Springer Science and Business Media LLC
Springer Science and Business Media LLC
Wiley
Springer Science and Business Media LLC
Elsevier BV
European Respiratory Society (ERS)
Public Library of Science (PLoS)
Wiley
Elsevier BV
Frontiers Media SA
Elsevier BV
Frontiers Media SA
Elsevier BV
Springer Science and Business Media LLC
Proceedings of the National Academy of Sciences
Public Library of Science (PLoS)
Springer Science and Business Media LLC
Wiley
Elsevier BV
Elsevier BV
Informa UK Limited
Wiley
American Society for Microbiology
Springer Science and Business Media LLC
Elsevier BV
American Association for Cancer Research (AACR)
Mary Ann Liebert Inc
Frontiers Media SA
Informa UK Limited
Elsevier BV
Springer Science and Business Media LLC
Springer Nature
Springer Science and Business Media LLC
Springer Science and Business Media LLC
IOP Publishing
Springer Science and Business Media LLC
Ovid Technologies (Wolters Kluwer Health)
PeerJ
Elsevier BV
Ovid Technologies (Wolters Kluwer Health)
American Chemical Society (ACS)
Wiley
American Physiological Society
EMBO
Springer Science and Business Media LLC
Informa UK Limited
Elsevier BV
Wiley
BMJ
Springer Science and Business Media LLC
Emerald
Cold Spring Harbor Laboratory
Springer Science and Business Media LLC
Springer Science and Business Media LLC
Springer Science and Business Media LLC
Springer Science and Business Media LLC
Springer Nature
Public Library of Science (PLoS)
Cambridge University Press (CUP)
Institute of Electrical and Electronics Engineers (IEEE)
BMJ
Genetics Society of America
Springer Science and Business Media LLC
Wiley
Frontiers Media SA
Springer Science and Business Media LLC
Springer Science and Business Media LLC
Springer Science and Business Media LLC
Elsevier BV
Elsevier BV
Springer Science and Business Media LLC
Frontiers Media SA
Frontiers Media SA
Springer Science and Business Media LLC
Springer Science and Business Media LLC
Public Library of Science (PLoS)
Public Library of Science (PLoS)
Wiley
Frontiers Media SA
Springer Nature
Public Library of Science (PLoS)
Annual Reviews
Informa UK Limited
Elsevier BV
Elsevier BV
Elsevier BV
Springer Science and Business Media LLC
Frontiers Media SA
Springer Nature
Springer Nature
Springer Science and Business Media LLC
Portland Press Ltd.
JMIR Publications Inc.
Wiley
Springer Science and Business Media LLC
Elsevier BV
Elsevier BV
Elsevier BV
BMJ
Elsevier BV
Informa UK Limited
eLife Sciences Publications, Ltd
Wiley
The Company of Biologists
Elsevier BV
Ovid Technologies (Wolters Kluwer Health)
Springer Science and Business Media LLC
Elsevier BV
Public Library of Science (PLoS)
American Society for Microbiology
BMJ
Elsevier BV
Springer Science and Business Media LLC
Springer Nature
Informa UK Limited
Wiley
American Society for Microbiology
Elsevier BV
Elsevier BV
Elsevier BV
Wiley
Springer Science and Business Media LLC
Elsevier BV
American Psychological Association (APA)
Springer Science and Business Media LLC
Springer Science and Business Media LLC
Springer Science and Business Media LLC
Elsevier BV
SAGE Publications
Elsevier BV
F1000 Research Ltd
SAGE Publications
Springer Science and Business Media LLC
Springer Science and Business Media LLC
Elsevier BV
Elsevier BV
Elsevier BV
SAGE Publications
Elsevier BV
Frontiers Media SA
Wiley
MalariaWorld
Elsevier BV
MDPI AG
Frontiers Media SA
Frontiers Media SA
Portland Press Ltd.
EMBO
Elsevier BV
Elsevier BV
F1000 Research Ltd
Elsevier BV
Elsevier BV
Springer Nature
Wiley
Elsevier BV
Frontiers Media SA
Elsevier BV
Elsevier BV
Elsevier BV
Springer Science and Business Media LLC
Ovid Technologies (Wolters Kluwer Health)
Public Library of Science (PLoS)
Wiley
Frontiers Media SA
Wiley
Springer Science and Business Media LLC
Springer Science and Business Media LLC
American Society of Nephrology (ASN)
Ovid Technologies (Wolters Kluwer Health)
American Association for Cancer Research (AACR)
Springer Science and Business Media LLC
Frontiers Media SA
Elsevier BV
Elsevier BV
Microbiology Society
Elsevier BV
Springer Science and Business Media LLC
Dove Medical Press Ltd.
Springer Nature
Springer Nature
Proceedings of the National Academy of Sciences
Society for Neuroscience
Wiley
IOS Press
Frontiers Media SA
Wiley
Springer Nature
American Chemical Society (ACS)
Elsevier BV
Elsevier BV
BMJ
BMJ
MDPI AG
Wiley
Wiley
Springer Science and Business Media LLC
Elsevier BV
Elsevier BV
Elsevier BV
Springer Nature
SAGE Publications
Galenos Yayinevi
Frontiers Media SA
Future Medicine Ltd
Cambridge University Press (CUP)
Elsevier BV
Elsevier BV
Elsevier BV
Springer Science and Business Media LLC
eLife Sciences Publications, Ltd
Cambridge University Press (CUP)
Impact Journals, LLC
Ferrata Storti Foundation (Haematologica)
Society for Neuroscience
Public Library of Science (PLoS)
SAGE Publications
Royal Society of Chemistry (RSC)
Informa UK Limited
Royal Society of Chemistry (RSC)
Informa UK Limited
Elsevier BV
Ovid Technologies (Wolters Kluwer Health)
Public Library of Science (PLoS)
Springer Science and Business Media LLC
Wiley
Wiley
Frontiers Media SA
Springer Science and Business Media LLC
Springer Science and Business Media LLC
EMBO
Springer Nature
Springer Nature
Wiley
Elsevier BV
Elsevier BV
Elsevier BV
Elsevier BV
Elsevier BV
Proceedings of the National Academy of Sciences
eLife Sciences Publications, Ltd
American Association for the Advancement of Science (AAAS)
Elsevier BV
Wiley
Springer Nature
Springer Science and Business Media LLC
F1000 Research Ltd
BMJ
Elsevier BV
Springer Nature
Wiley
Elsevier BV
Elsevier BV
Elsevier BV
Frontiers Media SA
Elsevier BV
Elsevier BV
Impact Journals, LLC
Elsevier BV
Public Library of Science (PLoS)
Cambridge University Press (CUP)
Wiley
Royal Society of Chemistry (RSC)
Oxford University Press (OUP)
American Medical Association (AMA)
Oxford University Press (OUP)
Oxford University Press (OUP)
Oxford University Press (OUP)
Oxford University Press (OUP)
Oxford University Press (OUP)
Oxford University Press (OUP)
Oxford University Press (OUP)
Oxford University Press (OUP)
Springer Science and Business Media LLC
Oxford University Press (OUP)
Elsevier BV
Elsevier BV
Springer Science and Business Media LLC
Springer Science and Business Media LLC
Public Library of Science (PLoS)
Public Library of Science (PLoS)
Elsevier BV
Elsevier BV
Springer Science and Business Media LLC
Springer Nature
American Society for Microbiology
eLife Sciences Publications, Ltd
Elsevier BV
Public Library of Science (PLoS)
Springer Science and Business Media LLC
Springer Science and Business Media LLC
Springer Nature
Cambridge University Press (CUP)
Genetics Society of America
F1000 ( Faculty of 1000 Ltd)
Elsevier BV
Elsevier BV
Springer Science and Business Media LLC
Springer Nature
Wiley
Cambridge University Press (CUP)
Genetics Society of America
SAGE Publications
Oxford University Press (OUP)
Informa UK Limited
Springer Nature
Society for Neuroscience
Hindawi Limited
Elsevier BV
The American Association of Immunologists
Cambridge University Press (CUP)
American Diabetes Association
Springer Nature
eLife Sciences Publications, Ltd
Cambridge University Press (CUP)
Wiley
Pan African Medical Journal
American Association for Clinical Chemistry (AACC)
SAGE Publications
Cambridge University Press (CUP)
Wiley
Pan African Medical Journal
Frontiers Media SA
Springer Nature
Springer Nature
BMJ
American Society for Biochemistry & Molecular Biology (ASBMB)
Springer Nature
Springer Science and Business Media LLC
Wiley
Wiley
BMJ
Elsevier BV
Wiley
Impact Journals, LLC
Elsevier BV
Frontiers Media SA
Ovid Technologies (Wolters Kluwer Health)
Oxford University Press (OUP)
Elsevier BV
American Association for the Advancement of Science (AAAS)
Elsevier BV
Elsevier BV
American Association for the Advancement of Science (AAAS)
The Company of Biologists
Oxford University Press (OUP)
International Union Against Tuberculosis and Lung Disease
Oxford University Press (OUP)
The Royal Society
American Thoracic Society
Springer Science and Business Media LLC
Oxford University Press (OUP)
Springer Science and Business Media LLC
Medknow
AME Publishing Company
Elsevier BV
Elsevier BV
Frontiers Media SA
Elsevier BV
Elsevier BV
American Society of Hematology
Springer Nature
Royal College of Physicians
Springer Science and Business Media LLC
American Association for the Advancement of Science (AAAS)
Springer Nature
Centers for Disease Control and Prevention (CDC)
EMBO
Oxford University Press (OUP)
Oxford University Press (OUP)
Wiley
Oxford University Press (OUP)
Oxford University Press (OUP)
Oxford University Press (OUP)
Oxford University Press (OUP)
Oxford University Press (OUP)
Elsevier
Dove Medical Press Ltd.
Springer Science and Business Media LLC
Proceedings of the National Academy of Sciences
Proceedings of the National Academy of Sciences
Wiley
MDPI AG
Elsevier BV
Springer Science and Business Media LLC
Wiley
Elsevier BV
Springer Nature
Public Library of Science (PLoS)
Microbiology Society
Springer Nature
Wiley
Springer Science and Business Media LLC
Elsevier BV
Oxford University Press (OUP)
Wiley
AME Publishing Company
Elsevier BV
Wiley
Elsevier BV
The Company of Biologists
Frontiers Media SA
American Society of Hematology
Elsevier BV
Elsevier BV
Springer Nature
Royal College of Physicians
MDPI AG
Centers for Disease Control and Prevention (CDC)
Oxford University Press (OUP)
American Medical Association (AMA)
Oxford University Press (OUP)
Oxford University Press (OUP)
Oxford University Press (OUP)
Oxford University Press (OUP)
Oxford University Press (OUP)
Springer Science and Business Media LLC
Oxford University Press (OUP)
American Thoracic Society
Oxford University Press (OUP)
Elsevier BV
SAGE Publications
Springer Science and Business Media LLC
Cambridge University Press (CUP)
Cold Spring Harbor Laboratory
AME Publishing Company
Bio-Protocol, LLC
Elsevier BV
The Royal Society
Oxford University Press (OUP)
Elsevier BV
Dove Medical Press Ltd.
American Association for the Advancement of Science (AAAS)
Ovid Technologies (Wolters Kluwer Health)
Springer Science and Business Media LLC
Elsevier BV
Impact Journals, LLC
Wiley
American Society for Pharmacology & Experimental Therapeutics (ASPET)
American Thoracic Society
Oxford University Press (OUP)
Elsevier BV
Oxford University Press (OUP)
Microbiology Society
Wiley
Springer Nature
Oxford University Press (OUP)
Oxford University Press (OUP)
Oxford University Press (OUP)
Oxford University Press (OUP)
Ovid Technologies (Wolters Kluwer Health)
Ovid Technologies (Wolters Kluwer Health)
Oxford University Press (OUP)
Oxford University Press (OUP)
Springer Science and Business Media LLC
Springer Science and Business Media LLC
Frontiers Media SA
Springer Science and Business Media LLC
The Company of Biologists
Public Library of Science (PLoS)
Informa UK Limited
WHO Press
Public Library of Science (PLoS)
Public Library of Science (PLoS)
Springer Nature
American Chemical Society (ACS)
American Society for Microbiology
Elsevier BV
Frontiers Media SA
Elsevier BV
Ovid Technologies (Wolters Kluwer Health)
Springer Science and Business Media LLC
Springer Nature
BMJ
Public Library of Science (PLoS)
Springer Science and Business Media LLC
Wiley
Elsevier BV
Elsevier BV
Springer Nature
Wiley
Wiley
Frontiers Media SA
Elsevier BV
Elsevier BV
American Association for the Advancement of Science (AAAS)
Proceedings of the National Academy of Sciences
BMJ Publishing Group
Wiley
Informa UK Limited
Elsevier BV
Elsevier BV
F1000 Research Ltd
Frontiers Media SA
Elsevier BV
Elsevier BV
Springer Nature
Springer Science and Business Media LLC
Springer Science and Business Media LLC
Springer Science and Business Media LLC
Wiley
Wiley
BMJ
Springer Science and Business Media LLC
eLife Sciences Publications, Ltd
American Chemical Society (ACS)
Public Library of Science (PLoS)
Future Medicine Ltd
Informa UK Limited
Royal Society of Chemistry (RSC)
Elsevier BV
Springer Nature
Springer Nature
BMJ
SAGE Publications
Wiley
Wiley
MyJove Corporation
Springer Nature
American Society for Microbiology
F1000 Research Ltd
MIT Press - Journals
F1000 Research Ltd
Wiley
Springer Science and Business Media LLC
Ferrata Storti Foundation (Haematologica)
Springer Science and Business Media LLC
Public Library of Science (PLoS)
Public Library of Science (PLoS)
Public Library of Science (PLoS)
Springer Science and Business Media LLC
American Society for Microbiology
WHO Press
WHO Press
Frontiers Media SA
BMJ
Springer Science and Business Media LLC
Wiley
SAGE Publications
Elsevier BV
Elsevier BV
American Society for Microbiology
Cambridge University Press (CUP)
Elsevier BV
Elsevier BV
Springer Science and Business Media LLC
Springer Nature
Public Library of Science (PLoS)
Cambridge University Press (CUP)
Wiley
Springer Science and Business Media LLC
Elsevier BV
Elsevier BV
Springer Nature
American Physiological Society
Rockefeller University Press
Public Library of Science (PLoS)
Wiley
MDPI AG
Springer Nature
Springer Science and Business Media LLC
Oxford University Press (OUP)
Springer Science and Business Media LLC
Public Library of Science (PLoS)
Wiley
BMJ
American Association for the Advancement of Science (AAAS)
The American Association of Immunologists
Elsevier BV
Frontiers Media SA
Springer Science and Business Media LLC
F1000 Research Ltd
F1000 Research Ltd
Frontiers Media SA
PeerJ
Wiley
Elsevier BV
Springer Nature
BMJ
Springer Science and Business Media LLC
BMJ
Elsevier BV
Microbiology Society
MDPI AG
Wiley
American Association for Cancer Research (AACR)
Public Library of Science (PLoS)
eLife Sciences Publications, Ltd
Informa UK Limited
Portland Press Ltd.
Portland Press Ltd.
Elsevier BV
Springer Science and Business Media LLC
Springer Nature
F1000 Research Ltd
Elsevier BV
Elsevier BV
Springer Nature
American Chemical Society (ACS)
Springer Science and Business Media LLC
Elsevier BV
Springer Science and Business Media LLC
Springer Science and Business Media LLC
Wiley
Elsevier BV
American Society for Cell Biology (ASCB)
The American Association of Immunologists
Public Library of Science (PLoS)
Springer Science and Business Media LLC
Elsevier BV
Springer Science and Business Media LLC
Elsevier BV
Springer Science and Business Media LLC
Portland Press Ltd.
Elsevier BV
MDPI AG
Elsevier BV
Elsevier BV
European Respiratory Society (ERS)
American Diabetes Association
Springer Science and Business Media LLC
American Chemical Society (ACS)
American Society for Microbiology
F1000 Research Ltd
Elsevier BV
Informa UK Limited
Elsevier
Elsevier BV
Public Library of Science (PLoS)
Wiley
Wiley
Frontiers Media SA
Elsevier BV
The American Association of Immunologists
Elsevier BV
Elsevier BV
Springer Science and Business Media LLC
Public Library of Science (PLoS)
Royal Society of Chemistry (RSC)
Elsevier BV
Springer Science and Business Media LLC
Wiley
Elsevier BV
Frontiers Media SA
Springer Science and Business Media LLC
Elsevier BV
Springer Science and Business Media LLC
Frontiers Media SA
American Association for Cancer Research (AACR)
eLife Sciences Publications, Ltd
Wiley
Elsevier BV
The Endocrine Society
Elsevier BV
Springer Science and Business Media LLC
The Company of Biologists
Springer Science and Business Media LLC
Public Library of Science (PLoS)
Portland Press Ltd.
Elsevier BV
Springer Nature
Springer Nature
Springer Science and Business Media LLC
Wiley
Proceedings of the National Academy of Sciences
University of Toronto Libraries - UOTL
Elsevier BV
Elsevier BV
Elsevier BV
eLife Sciences Publications, Ltd
Wiley
Wiley
Wiley
F1000 Research Ltd
Frontiers Media SA
Elsevier BV
Elsevier BV
Elsevier BV
Springer Science and Business Media LLC
Frontiers Media SA
Frontiers Media SA
Elsevier BV
Bioscientifica
EMBO
JMIR Publications Inc.
BMJ
Elsevier BV
Springer Science and Business Media LLC
Elsevier BV
Springer Science and Business Media LLC
Springer Science and Business Media LLC
Frontiers Media SA
Elsevier BV
Elsevier BV
American Chemical Society (ACS)
Cambridge University Press (CUP)
BMJ
Oxford University Press (OUP)
F1000 Research Ltd
Ovid Technologies (Wolters Kluwer Health)
Wiley
American Society for Microbiology
American Society for Clinical Investigation
Elsevier BV
Elsevier BV
Springer Science and Business Media LLC
S. Karger AG
Portland Press Ltd.
BMJ
American Society for Microbiology
Elsevier BV
Public Library of Science (PLoS)
Cambridge University Press (CUP)
F1000 Research Ltd
Elsevier BV
BMJ
Springer Nature
Elsevier BV
Elsevier BV
Springer Science and Business Media LLC
Springer Science and Business Media LLC
American Physiological Society
BMJ
Wiley
Wiley
American Chemical Society (ACS)
Wiley
Elsevier BV
BMJ
Public Library of Science (PLoS)
MDPI AG
eLife Sciences Publications, Ltd
Elsevier BV
The Royal Society
Elsevier BV
Elsevier BV
BMJ
Springer Science and Business Media LLC
Rockefeller University Press
Cambridge University Press (CUP)
Springer Science and Business Media LLC
AOSIS
Wiley
Frontiers Media SA
Elsevier BV
Springer Nature
Springer Science and Business Media LLC
Springer Nature
Elsevier BV
BMJ
BMJ Publishing Group
Springer Nature
American Diabetes Association
Public Library of Science (PLoS)
Microbiology Society
Elsevier BV
Frontiers Media SA
BMJ
Elsevier BV
American Association for the Advancement of Science (AAAS)
Springer Nature
Future Medicine Ltd
Wiley
Springer Science and Business Media LLC
Springer Science and Business Media LLC
Springer Science and Business Media LLC
Wiley
Frontiers Media SA
Elsevier BV
Elsevier BV
Springer Nature
Springer Science and Business Media LLC
Public Library of Science (PLoS)
Elsevier BV
Elsevier BV
Elsevier BV
Frontiers Media SA
PeerJ
Ovid Technologies (Wolters Kluwer Health)
eLife Sciences Publications, Ltd
Springer Science and Business Media LLC
American Association for Cancer Research (AACR)
Springer Science and Business Media LLC
Proceedings of the National Academy of Sciences
American Society of Hematology
Springer Science and Business Media LLC
Public Library of Science (PLoS)
BMJ
Elsevier BV
Springer Nature
Wiley
Elsevier BV
Elsevier BV
Elsevier BV
Springer Nature
Springer Nature
Society for Neuroscience
Wiley
Elsevier BV
Elsevier BV
eLife Sciences Publications, Ltd
American Chemical Society (ACS)
Wiley
Institute of Electrical and Electronics Engineers (IEEE)
Elsevier BV
Ovid Technologies (Wolters Kluwer Health)
Wiley
Elsevier BV
Public Library of Science (PLoS)
F1000 Research Ltd
Frontiers Media SA
Springer Science and Business Media LLC
Springer Nature
Springer Science and Business Media LLC
Proceedings of the National Academy of Sciences
Society for Neuroscience
Springer Science and Business Media LLC
Oxford University Press (OUP)
Elsevier BV
Proceedings of the National Academy of Sciences
Springer Science and Business Media LLC
Elsevier BV
Springer Science and Business Media LLC
Wiley
Elsevier BV
Springer Nature
Springer Science and Business Media LLC
Springer Science and Business Media LLC
Institute of Electrical and Electronics Engineers (IEEE)
Elsevier BV
Elsevier BV
Springer Science and Business Media LLC
American Association for Cancer Research (AACR)
American Society of Hematology
Microbiology Society
American Chemical Society (ACS)
Elsevier BV
Frontiers Media SA
Springer Science and Business Media LLC
Springer Nature
Wiley
Wiley
F1000 Research Ltd
Elsevier BV
Elsevier BV
Elsevier BV
Springer Science and Business Media LLC
Springer Nature
EMBO
Wiley
Springer Nature
Springer Science and Business Media LLC
Springer Science and Business Media LLC
Public Library of Science (PLoS)
eLife Sciences Publications, Ltd
Portland Press Ltd.
Ovid Technologies (Wolters Kluwer Health)
BMJ
Elsevier BV
American Society for Biochemistry & Molecular Biology (ASBMB)
BMJ
eLife Sciences Publications, Ltd
eLife Sciences Publications, Ltd
Springer Nature
Elsevier BV
Springer Nature
Portland Press Ltd.
American Association for Cancer Research (AACR)
F1000 Research Ltd
Dove Medical Press Ltd.
Springer Science and Business Media LLC
Springer Nature
BMJ
Public Library of Science (PLoS)
Wiley
Informa UK Limited
Elsevier BV
The American Association of Immunologists
Public Library of Science (PLoS)
Cambridge University Press (CUP)
American Chemical Society (ACS)
Hindawi Limited
Elsevier BV
Oxford University Press (OUP)
Springer Science and Business Media LLC
Springer Science and Business Media LLC
Springer Science and Business Media LLC
Springer Nature
Proceedings of the National Academy of Sciences
Public Library of Science (PLoS)
Elsevier BV
Elsevier BV
Springer Nature
Society for Neuroscience
Wiley
Wiley
Elsevier BV
Springer Science and Business Media LLC
BMJ
Society for Neuroscience
European Respiratory Society (ERS)
Springer Nature
Springer Science and Business Media LLC
Public Library of Science (PLoS)
Wiley
Wiley
Wiley
Wiley
Impact Journals, LLC
MyJove Corporation
American Chemical Society (ACS)
Elsevier BV
Springer Science and Business Media LLC
Springer Science and Business Media LLC
F1000 Research Ltd
F1000 Research Ltd
Springer Science and Business Media LLC
Springer Science and Business Media LLC
Springer Science and Business Media LLC
Proceedings of the National Academy of Sciences
Springer Nature
Genetics Society of America
Wiley
Elsevier BV
Elsevier BV
Impact Journals, LLC
Society for Neuroscience
Cold Spring Harbor Laboratory
Cold Spring Harbor Laboratory
American Thoracic Society
Mary Ann Liebert Inc
American Association for the Advancement of Science (AAAS)
Ovid Technologies (Wolters Kluwer Health)
The Royal Society
Rockefeller University Press
Springer Science and Business Media LLC
Oxford University Press (OUP)
Oxford University Press (OUP)
Oxford University Press (OUP)
Centers for Disease Control and Prevention (CDC)
Oxford University Press (OUP)
Oxford University Press (OUP)
Oxford University Press (OUP)
International Union Against Tuberculosis and Lung Disease
Oxford University Press (OUP)
Oxford University Press (OUP)
Ovid Technologies (Wolters Kluwer Health)
American Thoracic Society
Oxford University Press (OUP)
Elsevier BV
Elsevier BV
Springer Science and Business Media LLC
MDPI AG
Future Medicine Ltd
American Society for Clinical Investigation
Wiley
Genetics Society of America
F1000 ( Faculty of 1000 Ltd)
F1000 Research Ltd
Springer Science and Business Media LLC
Springer Science and Business Media LLC
Wiley
Wiley
Wiley
Elsevier BV
BMJ
Korean Society for Parasitology
Elsevier BV
Wiley
JMIR Publications Inc.
Springer Nature
Elsevier BV
Elsevier BV
Elsevier BV
Wiley
Korean Society of Exercise Rehabilitation
Elsevier BV
Proceedings of the National Academy of Sciences
Springer Science and Business Media LLC
Cambridge University Press (CUP)
Elsevier BV
Mary Ann Liebert Inc
Elsevier BV
Elsevier BV
American Society for Microbiology
Elsevier BV
Elsevier BV
Elsevier BV
BMJ
BMJ
Public Library of Science (PLoS)
American Chemical Society (ACS)
Elsevier BV
F1000 Research Ltd
Informa UK Limited
Wiley
Springer Science and Business Media LLC
Springer Science and Business Media LLC
Annual Reviews
Springer Science and Business Media LLC
American Chemical Society (ACS)
Portland Press Ltd.
Springer Science and Business Media LLC
American Chemical Society (ACS)
Informa UK Limited
Elsevier BV
American Society for Biochemistry & Molecular Biology (ASBMB)
Springer Science and Business Media LLC
Informa UK Limited
Springer Science and Business Media LLC
American Society for Clinical Investigation
Springer Science and Business Media LLC
The Royal Society
American Society of Tropical Medicine and Hygiene
Elsevier BV
American Medical Association (AMA)
American Association for the Advancement of Science (AAAS)
Ovid Technologies (Wolters Kluwer Health)
Elsevier BV
Elsevier BV
Elsevier BV
Elsevier BV
Oxford University Press (OUP)
Elsevier BV
Elsevier BV
Wiley
BMJ
Oxford University Press (OUP)
F1000 ( Faculty of 1000 Ltd)
Oxford University Press (OUP)
BMJ
Oxford University Press (OUP)
Oxford University Press (OUP)
American Chemical Society (ACS)
Portland Press Ltd.
Ovid Technologies (Wolters Kluwer Health)
Ovid Technologies (Wolters Kluwer Health)
Ovid Technologies (Wolters Kluwer Health)
Ovid Technologies (Wolters Kluwer Health)
Ovid Technologies (Wolters Kluwer Health)
Oxford University Press (OUP)
Elsevier BV
Oxford University Press (OUP)
Elsevier BV
Oxford University Press (OUP)
Wiley
The Royal Society
Elsevier BV
The Company of Biologists
Oxford University Press (OUP)
Elsevier BV
Wiley
Oxford University Press (OUP)
Springer Nature
F1000 Research Ltd
Springer Nature
Springer Nature
Society for Neuroscience
Informa UK Limited
Acoustical Society of America (ASA)
The Royal Society
American Association for the Advancement of Science (AAAS)
The Royal Society
The Royal Society
Elsevier BV
Springer Science and Business Media LLC
Society for Neuroscience
The Royal Society
Elsevier BV
JMIR Publications Inc.
Wiley
Royal Society of Chemistry (RSC)
Elsevier BV
Oxford University Press (OUP)
Oxford University Press (OUP)
Oxford University Press (OUP)
Oxford University Press (OUP)
Oxford University Press (OUP)
The Royal Society
American Medical Association (AMA)
Ovid Technologies (Wolters Kluwer Health)
Oxford University Press (OUP)
Springer Science and Business Media LLC
Public Library of Science (PLoS)
Springer Science and Business Media LLC
Elsevier BV
Elsevier BV
Elsevier BV
American Chemical Society (ACS)
Oxford University Press (OUP)
Informa UK Limited
Elsevier BV
Oxford University Press (OUP)
Elsevier BV
Elsevier BV
SPIE-Intl Soc Optical Eng
Elsevier BV
Elsevier BV
Springer Science and Business Media LLC
Springer Nature
The Royal Society
Oxford University Press (OUP)
Oxford University Press (OUP)
Centers for Disease Control and Prevention (CDC)
International Union Against Tuberculosis and Lung Disease
Oxford University Press (OUP)
Ovid Technologies (Wolters Kluwer Health)
Oxford University Press (OUP)
Oxford University Press (OUP)
Ovid Technologies (Wolters Kluwer Health)
Oxford University Press (OUP)
Ovid Technologies (Wolters Kluwer Health)
Ovid Technologies (Wolters Kluwer Health)
BMJ
Elsevier BV
Elsevier BV
Springer Nature
Springer Science and Business Media LLC
MIT Press - Journals
F1000 Research Ltd
Springer Science and Business Media LLC
Elsevier BV
Springer Nature
Society for Neuroscience
Springer Science and Business Media LLC
Public Library of Science (PLoS)
Proceedings of the National Academy of Sciences
Proceedings of the National Academy of Sciences
Springer Science and Business Media LLC
Public Library of Science (PLoS)
Springer Science and Business Media LLC
Elsevier BV
BMJ
Springer Science and Business Media LLC
Springer Science and Business Media LLC
Springer Science and Business Media LLC
Springer Nature
Elsevier BV
BMJ
Elsevier BV
Frontiers Media SA
BMJ
Elsevier BV
Elsevier BV
Public Library of Science (PLoS)
Wiley
MDPI AG
Cambridge University Press (CUP)
Springer Nature
Ovid Technologies (Wolters Kluwer Health)
BMJ Publishing Group
EMBO
MDPI AG
Informa UK Limited
Springer Science and Business Media LLC
Wiley
Wiley
Public Library of Science (PLoS)
Impact Journals, LLC
F1000 Research Ltd
Elsevier BV
Springer Science and Business Media LLC
Cambridge University Press (CUP)
Wiley
Wiley
F1000 Research Ltd
Frontiers Media SA
American Diabetes Association
eLife Sciences Publications, Ltd
Frontiers Media SA
BMJ
Wiley
Springer Science and Business Media LLC
F1000 Research Ltd
BMJ
Springer Science and Business Media LLC
Public Library of Science (PLoS)
Wiley
Springer Science and Business Media LLC
Elsevier BV
American Association for the Advancement of Science (AAAS)
European Respiratory Society (ERS)
Wiley
Elsevier BV
Elsevier BV
MDPI AG
SAGE Publications
American Society for Microbiology
F1000 Research Ltd
Elsevier BV
Elsevier BV
Elsevier BV
American Society for Biochemistry & Molecular Biology (ASBMB)
Public Library of Science (PLoS)
Impact Journals, LLC
Elsevier BV
Proceedings of the National Academy of Sciences
Springer Science and Business Media LLC
Springer Science and Business Media LLC
Springer Science and Business Media LLC
Elsevier BV
Springer Science and Business Media LLC
Springer Science and Business Media LLC
eLife Sciences Publications, Ltd
Wiley
Royal Society of Chemistry (RSC)
Springer Science and Business Media LLC
SAGE Publications
Elsevier BV
Informa UK Limited
Springer Nature
Rockefeller University Press
Springer Nature
eLife Sciences Publications, Ltd
SAGE Publications
Elsevier BV
Proceedings of the National Academy of Sciences
BMJ
Institute of Electrical and Electronics Engineers (IEEE)
Proceedings of the National Academy of Sciences
Springer Nature
Rockefeller University Press
Cambridge University Press (CUP)
American Society for Microbiology
Springer Science and Business Media LLC
Elsevier BV
Elsevier BV
Springer Nature
Springer Science and Business Media LLC
Portland Press Ltd.
BMJ
Springer Science and Business Media LLC
Public Library of Science (PLoS)
Wiley
Elsevier BV
American Society for Clinical Investigation
Proceedings of the National Academy of Sciences
Springer Science and Business Media LLC
Springer Science and Business Media LLC
EMBO
Springer Nature
Wiley
Springer Science and Business Media LLC
eLife Sciences Publications, Ltd
Springer Nature
Springer Science and Business Media LLC
Springer Nature
American Chemical Society (ACS)
Elsevier BV
BMJ
Elsevier BV
Springer Nature
Springer Science and Business Media LLC
Springer Science and Business Media LLC
Elsevier BV
Elsevier BV
Elsevier BV
Rockefeller University Press
Frontiers Media SA
Springer Nature
Springer Nature
Elsevier BV
eLife Sciences Publications, Ltd
eLife Sciences Publications, Ltd
Elsevier BV
Springer Nature
Wiley
Public Library of Science (PLoS)
Cambridge University Press (CUP)
Cambridge University Press (CUP)
BMJ
BMJ
Elsevier BV
Frontiers Media SA
Springer Nature
American Society for Biochemistry & Molecular Biology (ASBMB)
MDPI AG
Springer Nature
Springer Science and Business Media LLC
Elsevier BV
Frontiers Media SA
Proceedings of the National Academy of Sciences
Proceedings of the National Academy of Sciences
Springer Science and Business Media LLC
EMBO
Springer Science and Business Media LLC
Informa UK Limited
Springer Science and Business Media LLC
Elsevier BV
Elsevier BV
Springer Nature
Springer Science and Business Media LLC
Proceedings of the National Academy of Sciences
Proceedings of the National Academy of Sciences
EMBO
JMIR Publications Inc.
Cambridge University Press (CUP)
Public Library of Science (PLoS)
Wiley
American Chemical Society (ACS)
Wiley
Elsevier BV
Elsevier BV
Elsevier BV
Springer Science and Business Media LLC
Rockefeller University Press
eLife Sciences Publications, Ltd
Springer Science and Business Media LLC
Hindawi Limited
International Union of Crystallography (IUCr)
American Physiological Society
American Society for Cell Biology (ASCB)
Public Library of Science (PLoS)
American Society for Microbiology
American Society for Microbiology
Springer Science and Business Media LLC
Wiley
Springer Science and Business Media LLC
Springer Science and Business Media LLC
American Society for Microbiology
Frontiers Media SA
Springer Nature
Cold Spring Harbor Laboratory
eLife Sciences Publications, Ltd
Springer Science and Business Media LLC
American Society for Biochemistry & Molecular Biology (ASBMB)
Public Library of Science (PLoS)
Public Library of Science (PLoS)
Public Library of Science (PLoS)
Springer Science and Business Media LLC
Wiley
eLife Sciences Publications, Ltd
Microbiology Society
Proceedings of the National Academy of Sciences
American Society for Microbiology
Public Library of Science (PLoS)
Frontiers Media SA
American Association for the Advancement of Science (AAAS)
Elsevier BV
Springer Science and Business Media LLC
Proceedings of the National Academy of Sciences
Springer Science and Business Media LLC
Frontiers Media SA
Elsevier BV
Springer Science and Business Media LLC
Public Library of Science (PLoS)
Elsevier BV
Springer Nature
EMBO
Ovid Technologies (Wolters Kluwer Health)
Public Library of Science (PLoS)
American Chemical Society (ACS)
Wiley
F1000 ( Faculty of 1000 Ltd)
F1000 Research Ltd
Elsevier BV
American Society for Biochemistry & Molecular Biology (ASBMB)
American Society of Nephrology (ASN)
American Society of Hematology
Public Library of Science (PLoS)
Public Library of Science (PLoS)
Cambridge University Press (CUP)
Cambridge University Press (CUP)
Springer Science and Business Media LLC
Wiley
Elsevier BV
Proceedings of the National Academy of Sciences
Elsevier BV
Springer Science and Business Media LLC
Springer Nature
American Association for Cancer Research (AACR)
eLife Sciences Publications, Ltd
Wiley
Springer Nature
American Psychological Association (APA)
Frontiers Media SA
Elsevier BV
BMJ
Cold Spring Harbor Laboratory
BMJ
Wiley
Springer Science and Business Media LLC
Springer Science and Business Media LLC
Wiley
Elsevier BV
Elsevier BV
Springer Science and Business Media LLC
Wiley
Informa UK Limited
American Society of Hematology
Elsevier BV
Wiley
Wiley
Springer Science and Business Media LLC
Public Library of Science (PLoS)
The Company of Biologists
SAGE Publications
Elsevier BV
Elsevier BV
eLife Sciences Publications, Ltd
American Society for Microbiology
Elsevier BV
BMJ
Springer Science and Business Media LLC
Frontiers Media SA
Elsevier BV
Public Library of Science (PLoS)
American Society for Microbiology
Mary Ann Liebert Inc
Springer Nature
Royal Society of Chemistry (RSC)
Springer Science and Business Media LLC
Springer Science and Business Media LLC
American Association for Cancer Research (AACR)
Public Library of Science (PLoS)
Springer Science and Business Media LLC
Springer Science and Business Media LLC
American Society for Microbiology
Springer Nature
Springer Science and Business Media LLC
BMJ
American Physiological Society
Microbiology Society
Springer Nature
eLife Sciences Publications, Ltd
Wiley
European Respiratory Society (ERS)
Springer Science and Business Media LLC
American Society of Tropical Medicine and Hygiene
Elsevier BV
Elsevier BV
Genetics Society of America
Public Library of Science (PLoS)
Public Library of Science (PLoS)
Microbiology Society
Frontiers Media SA
Springer Science and Business Media LLC
The Company of Biologists
American Association for Cancer Research (AACR)
Springer Nature
Public Library of Science (PLoS)
Springer Science and Business Media LLC
American Chemical Society (ACS)
Frontiers Media SA
MDPI AG
MDPI AG
Frontiers Media SA
Frontiers Media SA
American Physiological Society
Springer Science and Business Media LLC
Informa UK Limited
Springer Science and Business Media LLC
Springer Science and Business Media LLC
F1000 Research Ltd
BMJ
Alphamed Press
Springer Science and Business Media LLC
Wiley
Informa UK Limited
Frontiers Media SA
Springer Science and Business Media LLC
Public Library of Science (PLoS)
eLife Sciences Publications, Ltd
eLife Sciences Publications, Ltd
F1000 Research Ltd
Frontiers Media SA
Elsevier BV
Elsevier BV
Elsevier BV
The Company of Biologists
Public Library of Science (PLoS)
Cambridge University Press (CUP)
Wiley
Wiley
Springer Science and Business Media LLC
Springer Science and Business Media LLC
Elsevier BV
Elsevier BV
eLife Sciences Publications, Ltd
F1000 Research Ltd
Elsevier BV
Springer Science and Business Media LLC
Springer Science and Business Media LLC
Elsevier BV
Ovid Technologies (Wolters Kluwer Health)
Public Library of Science (PLoS)
Proceedings of the National Academy of Sciences
Elsevier BV
Springer Science and Business Media LLC
Springer Science and Business Media LLC
BMJ
Springer Science and Business Media LLC
Wiley
Cambridge University Press (CUP)
Society for Neuroscience
Association for Research in Vision and Ophthalmology (ARVO)
Springer Nature
Springer Science and Business Media LLC
eLife Sciences Publications, Ltd
Public Library of Science (PLoS)
BMJ
Elsevier BV
BMJ
SAGE Publications
F1000 Research Ltd
BMJ
Springer Nature
American Society for Microbiology
Wiley
Elsevier BV
Public Library of Science (PLoS)
Wiley
The American Association of Immunologists
Microbiology Society
Wiley
F1000 Research Ltd
Springer Nature
Springer Nature
Springer Science and Business Media LLC
Microbiology Society
Frontiers Media SA
Elsevier BV
BMJ
Springer Science and Business Media LLC
Elsevier BV
Ovid Technologies (Wolters Kluwer Health)
Wolters Kluwer Medknow Publications
Bio-Protocol, LLC
American Association for the Advancement of Science (AAAS)
Elsevier BV
Elsevier BV
Elsevier BV
Society for Neuroscience
Elsevier BV
Elsevier BV
Oxford University Press (OUP)
Elsevier BV
Ovid Technologies (Wolters Kluwer Health)
American Association for the Advancement of Science (AAAS)
Oxford University Press (OUP)
The Endocrine Society
Cambridge University Press (CUP)
Oxford University Press (OUP)
Centers for Disease Control and Prevention (CDC)
Elsevier BV
Oxford University Press (OUP)
Oxford University Press (OUP)
Oxford University Press (OUP)
Walter de Gruyter GmbH
F1000 Research Ltd
Elsevier BV
Rockefeller University Press
Royal College of Psychiatrists
Elsevier BV
BMJ
Springer Nature
Springer Nature
Institute of Mathematical Statistics
Elsevier BV
Springer Nature
BMJ
eLife Sciences Publications, Ltd
MDPI AG
Wiley
Springer Science and Business Media LLC
Elsevier BV
Ovid Technologies (Wolters Kluwer Health)
EMBO
Springer Nature
Public Library of Science (PLoS)
BMJ Publishing Group
Elsevier BV
Wiley
Springer Nature
American Society for Biochemistry & Molecular Biology (ASBMB)
BMJ
American Society of Hematology
Massachusetts Medical Society
Frontiers Media SA
Frontiers Media SA
BMJ
American Society of Hematology
Elsevier BV
BMJ
eLife Sciences Publications, Ltd
Elsevier BV
Elsevier BV
Cambridge University Press (CUP)
American Chemical Society (ACS)
American Association for Cancer Research (AACR)
Wiley
Swansea University
African Journals Online (AJOL)
International Medical Publisher (Fundacion de Neurociencias)
Elsevier BV
Oxford University Press (OUP)
American Association for the Advancement of Science (AAAS)
Elsevier BV
Wiley
Elsevier BV
Project Muse
Oxford University Press (OUP)
Oxford University Press (OUP)
Oxford University Press (OUP)
Oxford University Press (OUP)
Elsevier BV
The Endocrine Society
Elsevier BV
Elsevier BV
Elsevier BV
Elsevier BV
American Society of Hematology
Public Library of Science (PLoS)
Oxford University Press (OUP)
Elsevier BV
Oxford University Press (OUP)
Oxford University Press (OUP)
Wiley
Oxford University Press (OUP)
Oxford University Press (OUP)
Cold Spring Harbor Laboratory
Oxford University Press (OUP)
Ovid Technologies (Wolters Kluwer Health)
Springer Nature
Springer Science and Business Media LLC
F1000 Research Ltd
American Society of Tropical Medicine and Hygiene
Rockefeller University Press
Elsevier BV
Springer Science and Business Media LLC
F1000 Research Ltd
Proceedings of the National Academy of Sciences
Springer Science and Business Media LLC
Springer Science and Business Media LLC
Springer Nature
BMJ
American Chemical Society (ACS)
Royal Society of Chemistry (RSC)
F1000 Research Ltd
Springer Nature
BMJ
BMJ
Proceedings of the National Academy of Sciences
Springer Science and Business Media LLC
Public Library of Science (PLoS)
Springer Science and Business Media LLC
Wiley
F1000 Research Ltd
Frontiers Media SA
Wiley
The American Association of Immunologists
Informa UK Limited
Joule Inc.
Elsevier BV
SAGE Publications
Springer Science and Business Media LLC
Elsevier BV
Elsevier BV
Oxford University Press (OUP)
Oxford University Press (OUP)
American Association for the Advancement of Science (AAAS)
Oxford University Press (OUP)
Genetics Society of America
Oxford University Press (OUP)
Association for Research in Vision and Ophthalmology (ARVO)
Springer Nature
Springer Nature
Oxford University Press (OUP)
Oxford University Press (OUP)
Oxford University Press (OUP)
Oxford University Press (OUP)
Shared Science Publishers OG
Springer Science and Business Media LLC
Springer Nature
American Chemical Society (ACS)
Springer Science and Business Media LLC
BMJ
Springer Science and Business Media LLC
Elsevier BV
European Respiratory Society (ERS)
Edinburgh University Press
Informa UK Limited
Elsevier BV
Future Medicine Ltd
Elsevier BV
Oxford University Press (OUP)
Association for Research in Vision and Ophthalmology (ARVO)
Springer Science and Business Media LLC
Impact Journals, LLC
Elsevier BV
Elsevier BV
Elsevier BV
Oxford University Press (OUP)
Elsevier BV
Oxford University Press (OUP)
Elsevier BV
Oxford University Press (OUP)
Elsevier BV
Oxford University Press (OUP)
Oxford University Press (OUP)
Oxford University Press (OUP)
Oxford University Press (OUP)
Royal Society of Chemistry (RSC)
Oxford University Press (OUP)
Elsevier BV
Oxford University Press (OUP)
International Union Against Tuberculosis and Lung Disease
Ovid Technologies (Wolters Kluwer Health)
Oxford University Press (OUP)
Oxford University Press (OUP)
American Thoracic Society
Oxford University Press (OUP)
Oxford University Press (OUP)
Oxford University Press (OUP)
Frontiers Media SA
Genetics Society of America
SAGE Publications
Future Medicine Ltd
Informa UK Limited
Elsevier BV
Proceedings of the National Academy of Sciences
Oxford University Press (OUP)
Oxford University Press (OUP)
Elsevier BV
Elsevier BV
Elsevier BV
Oxford University Press (OUP)
Elsevier BV
Oxford University Press (OUP)
Royal Society of Chemistry (RSC)
American Association for the Advancement of Science (AAAS)
Elsevier BV
Elsevier BV
Elsevier BV
Oxford University Press (OUP)
The Endocrine Society
Oxford University Press (OUP)
Wiley
Ovid Technologies (Wolters Kluwer Health)
Elsevier BV
Wiley
The Royal Society
The Royal Society
EMBO
American Thoracic Society
Oxford University Press (OUP)
American Thoracic Society
[truncated: 5,330 more rows]
